# Supplementary material
Source: PubMed Central journal article supplement (PMC3784539)
Supplement: JCI69035sd.pdf [file JCI69035sd.pdf]

# Supplementary Figure 1

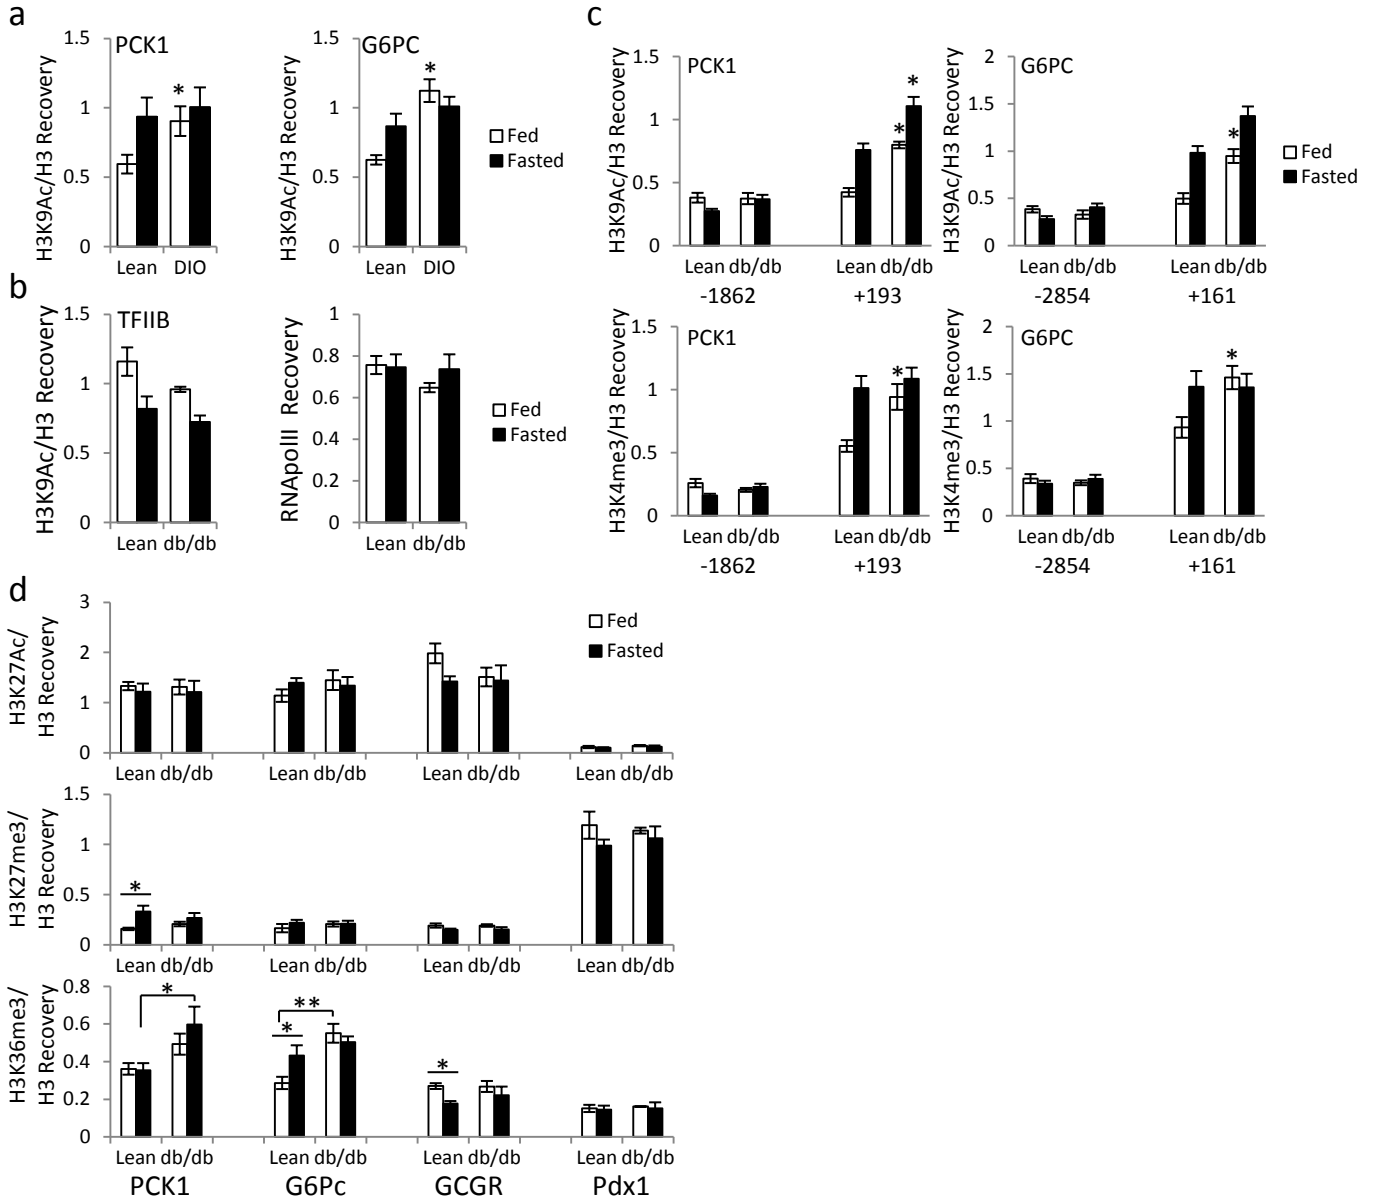

**Supplementary figure 1.** **a**, Chromatin Immunoprecipitation (ChIP) assay of H3K9Ac over *Pck1* and *G6pc* genes in livers of lean and DIO mice (\*;  $P < 0.05$  relative to lean mice;  $n = 3$ ). **b**, ChIP assay of H3K9Ac and RNA pol II levels over the *Tfrib* gene in livers from fasted or fed mice. **c**, ChIP assay of H3K9Ac and H3K4me3 levels over proximal and distal regions of the *Pck1* and *G6pc* genes in livers from fasted or fed mice (\*;  $P < 0.05$  relative to lean mice;  $n = 3$ ). **d**, ChIP assay of H3K27Ac, H3K27me3 and H3K36me3 over gluconeogenic genes *Pck1* and *G6pc* and control genes *Gcgr* and *Pdx1* in livers from fasted or fed lean db/+ and diabetic db/db mice (\*;  $P < 0.05$ ;  $n = 3$ ).

## Supplementary Figure 2

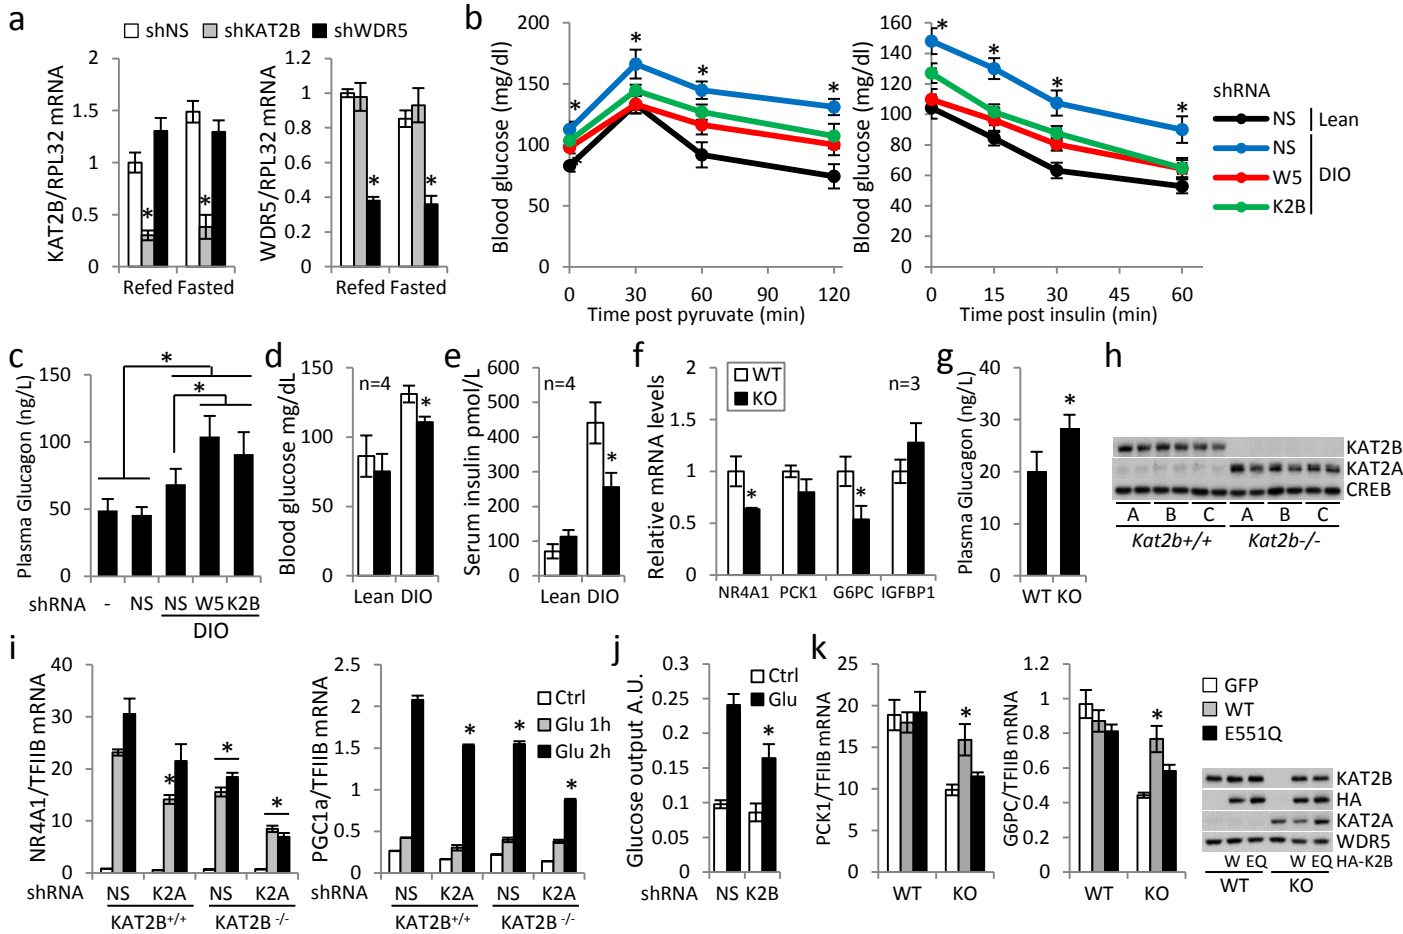

**Supplementary figure 2.** **a**, Effect of *Kat2b* or *Wdr5* RNAis on hepatic mRNA amounts for *Kat2b* and *Wdr5* from fasted or fed mice. **b**, Pyruvate tolerance test and insulin tolerance tests on lean and DIO mice depleted for either *Wdr5* (W5) or *Kat2b* (K2B) (\*;  $P < 0.05$ ;  $n = 5$ ). **c**, Plasma glucagon levels from 12 hour fasted, lean or DIO mice depleted of *Wdr5* or *Kat2b* (\*;  $P < 0.05$ ;  $n = 4$ ). **d-h**, Fasting blood glucose (**d**), circulating insulin (**e**), hepatic gene expression (**f**), circulating glucagon (**g**) and protein levels (**h**) in wild-type and *Kat2b*<sup>-/-</sup> mice under lean and high fat diet (DIO) conditions. mRNA levels in panel **f** measured in livers from DIO mice (\*;  $P < 0.05$ ;  $n = 3$ ) and circulating glucagon (**g**) from lean mice (\*;  $P < 0.05$ ;  $n = 4$ ). Hepatic levels of KAT2A, KAT2B and CREB protein (**h**) from wild-type and *Kat2b*<sup>-/-</sup> DIO mice run in duplicates ( $n = 3$ ). **i**, Effect of *Kat2a* depletion on mRNA amounts for *Nr4a1* and *Ppargc1a* in cultured hepatocytes from wild-type or *Kat2b*<sup>-/-</sup> mice exposed to glucagon for 1 or 2 hours (\*;  $P < 0.05$ ;  $n = 3$ ). **j**, *In vitro* glucose output from hepatocytes depleted for *Kat2b* normalized to whole cell protein (\*;  $P < 0.05$  relative to wt, shNS control mice;  $n = 4$ ). **k**, Effect of adenoviral wild-type or catalytically inactive (E551Q) KAT2B expression on *Pck1* and *G6pc* mRNA amounts in *Kat2b*<sup>-/-</sup> hepatocytes exposed to glucagon (\*;  $P < 0.05$ ;  $n = 3$ ). Right, immunoblot showing levels of endogenous and HA-tagged WT or E551Q mutant KAT2B.

## Supplementary Figure 3

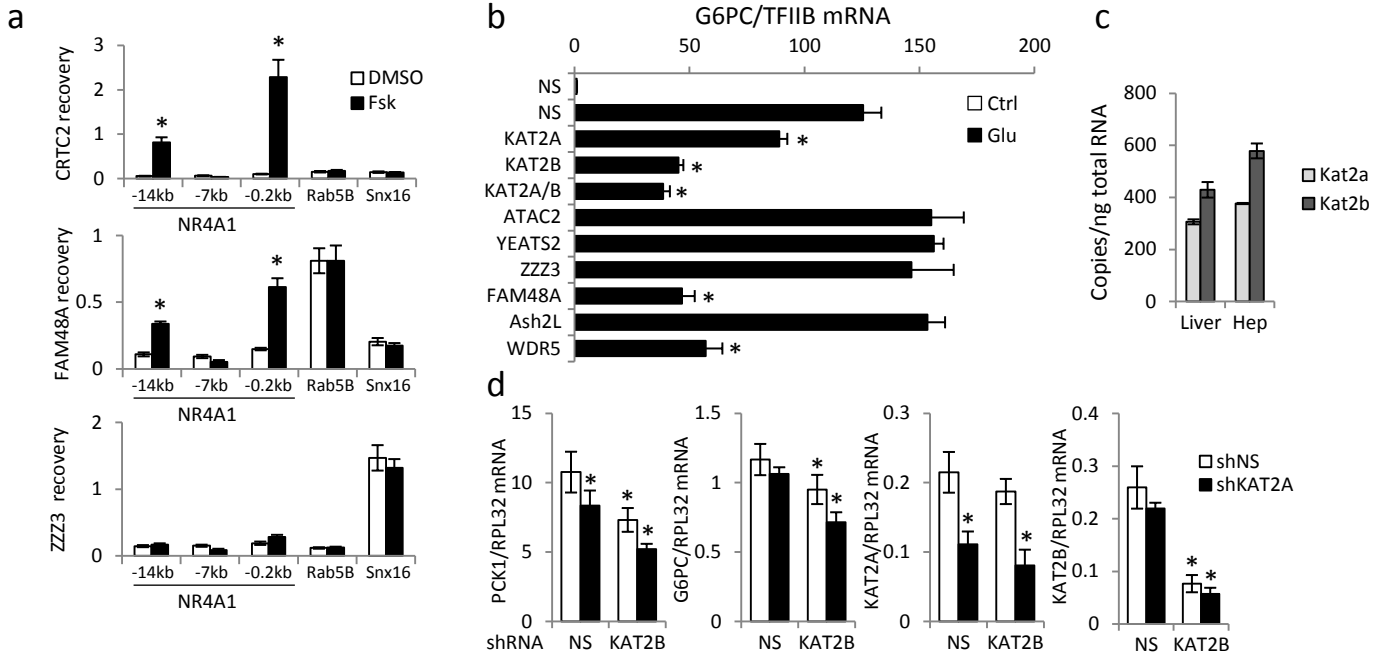

**Supplementary figure 3. a**, ChIP assay of HEK293T cells showing relative effects of FSK on recruitment of components in SAGA (FAM48A) and ATAC2 (ZZZ3) complexes to CREB binding sites (-14kb, -0.2kb) or CREB-negative region (-7kb) over the *Nr4a1* gene. FAM48A and ZZZ3 occupancy over known SAGA (*Rab5b*) and ATAC2 (*Snx16*) target genes shown for comparison. **b**, mRNA levels for *G6pc* in cultured hepatocytes following RNAi mediated knockdown of components in ATAC (*Kat2a*, *Kat2b*, *Atac2*, *Yeats2*, *Zzz3*), SAGA (*Kat2a*, *Kat2b*, *Fam48*), and KMT (*Wdr5*, *Ash2l*) complexes. Exposure to glucagon indicated (\*;  $P < 0.05$ ;  $n = 3$ ). **c**, Absolute quantification of *Kat2a* and *Kat2b* mRNA levels in primary hepatocytes and livers from lean, fasted mice. **d**, Fasting mRNA levels from livers depleted for *Kat2a*, *Kat2b* or *Kat2a* and *b* in combination (\*;  $P < 0.05$ ;  $n = 4$ ).

## Supplementary Figure 4

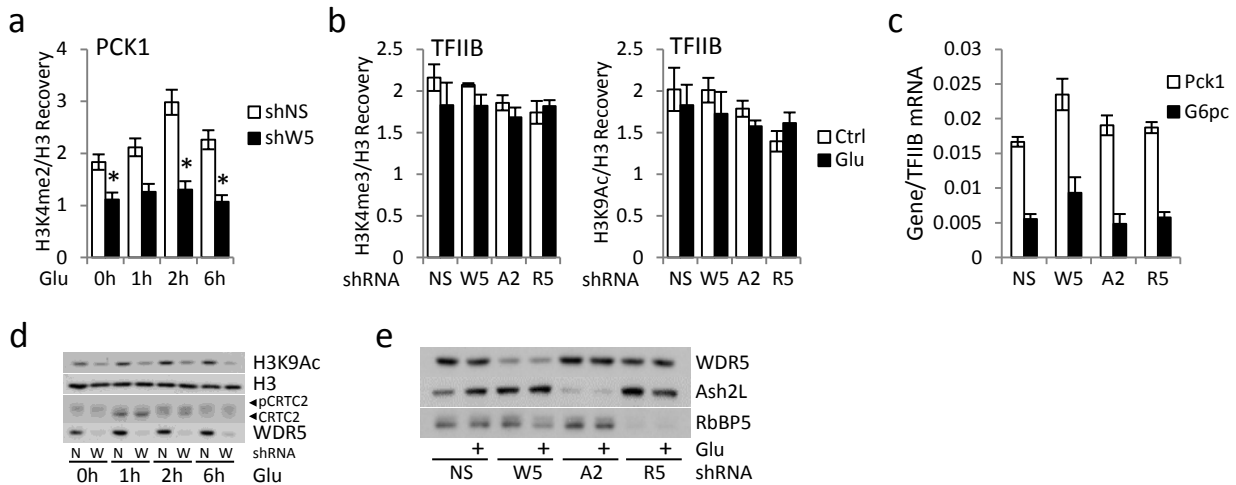

**Supplementary figure 4.** **a**, Effect of *Wdr5* RNAi on H3K4me2 over the *G6pc* promoter in hepatocytes exposed to glucagon. **b**, Effects of *Wdr5*, *Ash2l*, and *Rbbp5* depletion on H3K4me3 and H3K9Ac over the *Tfiiib* promoter in hepatocytes exposed to glucagon. **c**, Basal *Pck1* and *G6pc* mRNA levels in primary hepatocytes depleted for *Wdr5*, *Ash2L* or *Rbbp5*. **d**, Immunoblots showing cellular levels of H3K9 acetylation and CRTC2 protein in *Wdr5*-depleted hepatocytes stimulated with glucagon. **e**, Immunoblot showing effect of adenovirally encoded RNAi for *Wdr5*, *Ash2l*, and *Rbbp5* on protein amounts for each gene in hepatocytes exposed to glucagon (\*;  $P < 0.05$ ;  $n = 3$ ).

## Supplementary Figure 5

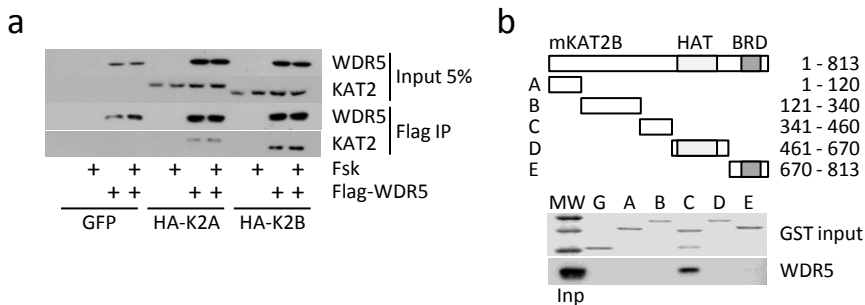

**Supplementary figure 5.** **a**, Immunoblot showing recovery of HA-tagged KAT2A and KAT2B from immunoprecipitates of Flag-tagged WDR5 prepared from HEK293T cells exposed to FSK. **b**, GST-pull down showing direct association between WDR5 and residues 341-460 of KAT2B.

## Supplementary Figure 6

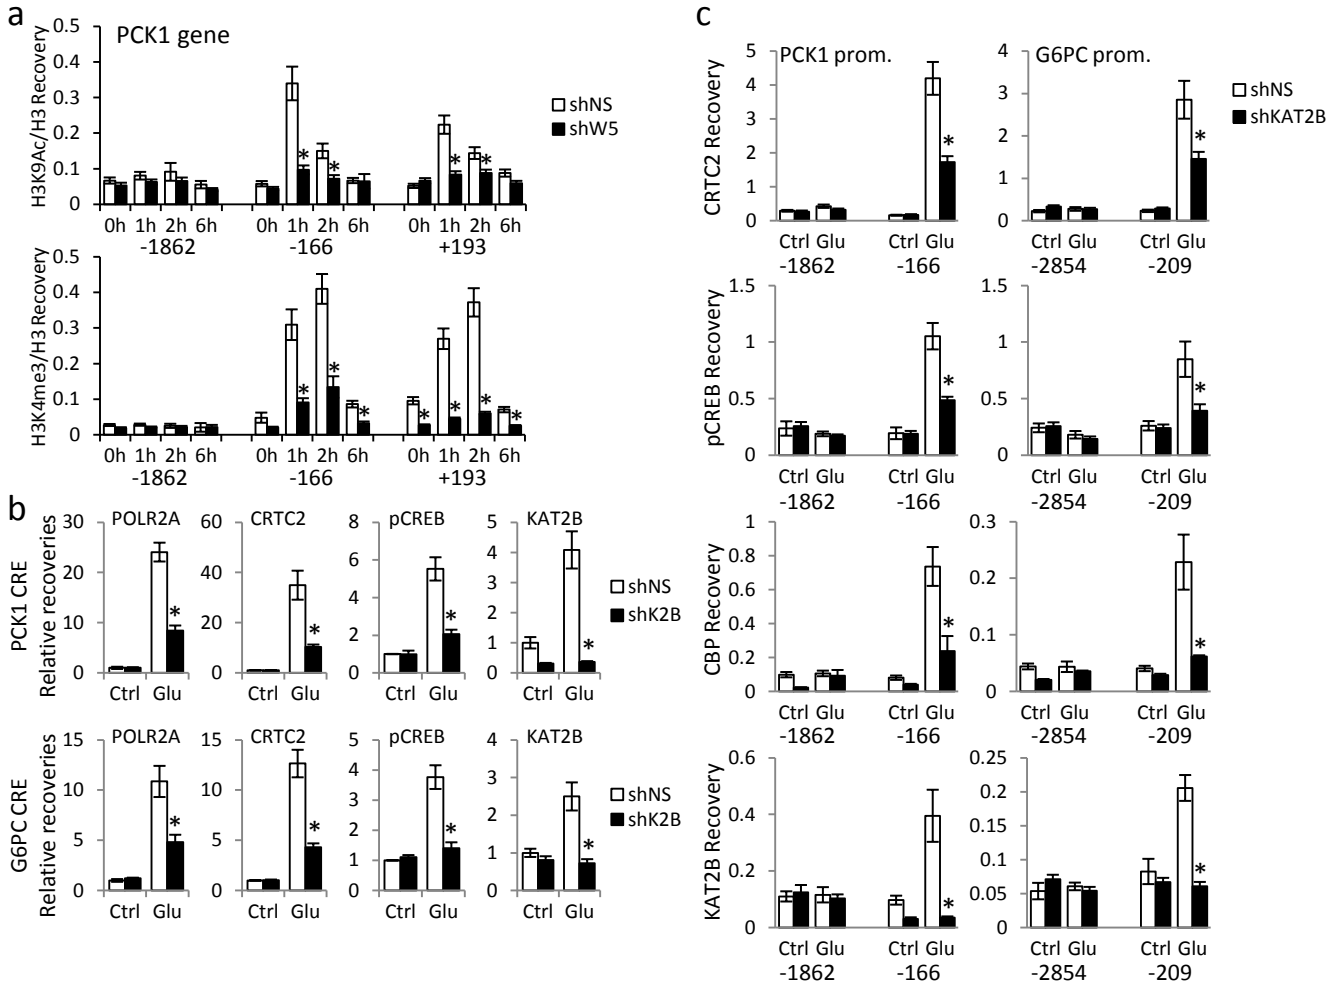

**Supplementary figure 6. a**, Effect of *Wdr5* depletion on glucagon-induced H3K9Ac and H3K4me3 amounts over the *Pck1* gene in primary hepatocytes. **b, c**, ChIP assays showing effect of *Kat2b* depletion on recruitment of P-CREB, CRTC2, RNA polymerase II, CBP, KAT2B, and WDR5 to CREB binding sites and upstream regions of the *Pck1* and *G6pc* promoters in hepatocytes exposed to glucagon for 1 hour (\*;  $P < 0.05$ ;  $n=3$ ).

## Supplementary Figure 7

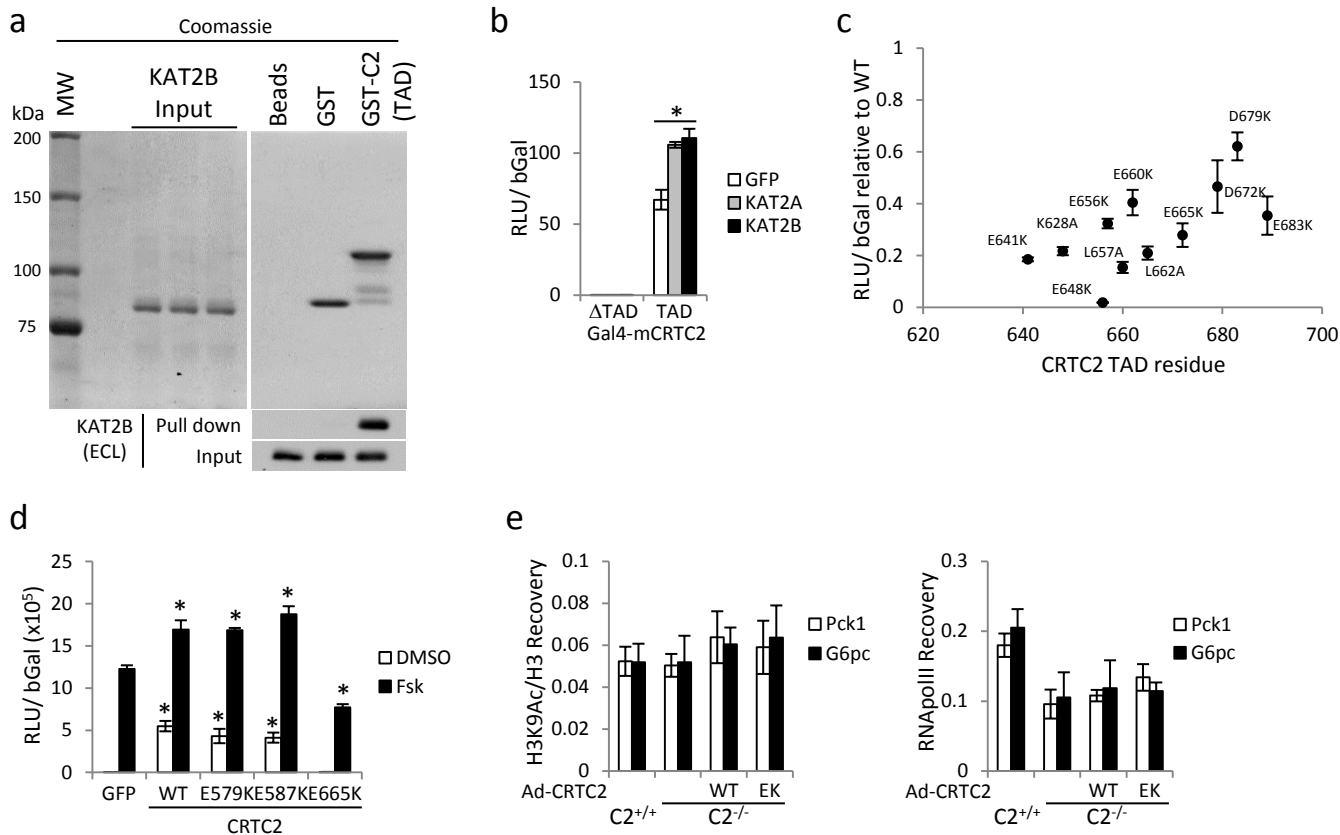

**Supplementary figure 7. a**, GST pull-down assay of purified KAT2B protein with purified GST-CRTC2 (TAD, aa. 601-692) or GST alone. **b**, Transient assay of chromosomal GAL4-luc reporter activity in HEK293T cells expressing GAL4-CRTC2 constructs containing the GAL4 DNA binding domain fused to CRTC2 lacking the trans-activation domain ( $\Delta$ TAD, aa. 1-632) or to the TAD alone (aa. 624-692). Effects of GFP, KAT2A, or KAT2B over-expression on GAL4-CRTC2 activity shown. Luciferase activity normalized to  $\beta$ -gal activity (\*;  $P < 0.05$ ;  $n = 3$ ). **c**, Effect of mutations in the CRTC2 trans-activation domain (TAD) on its activity in the context of GAL4 DNA binding domain-TAD (GAL4-TAD) fusion proteins. Activity from a chromosomal GAL4-luc reporter in HEK293T cells normalized to  $\beta$ -galactosidase activity. **d**, Transient assay of wild-type and mutant CRTC2 (E579K, E587K or E665K) in HEK293T cells co-transfected with CRE-luc reporter plasmid. Exposure to FSK indicated. Luciferase activity normalized to beta-galactosidase activity (\*;  $P < 0.05$ ;  $n = 3$ ). **e**, Basal H3K9Ac and RNApolIII association with Pck1 and G6pc genes in wild-type or *Crtc2*<sup>-/-</sup> hepatocytes following reconstitution with wild-type or KAT2B-defective (E665K) mutant CRTC2.

## Supplementary Figure 8

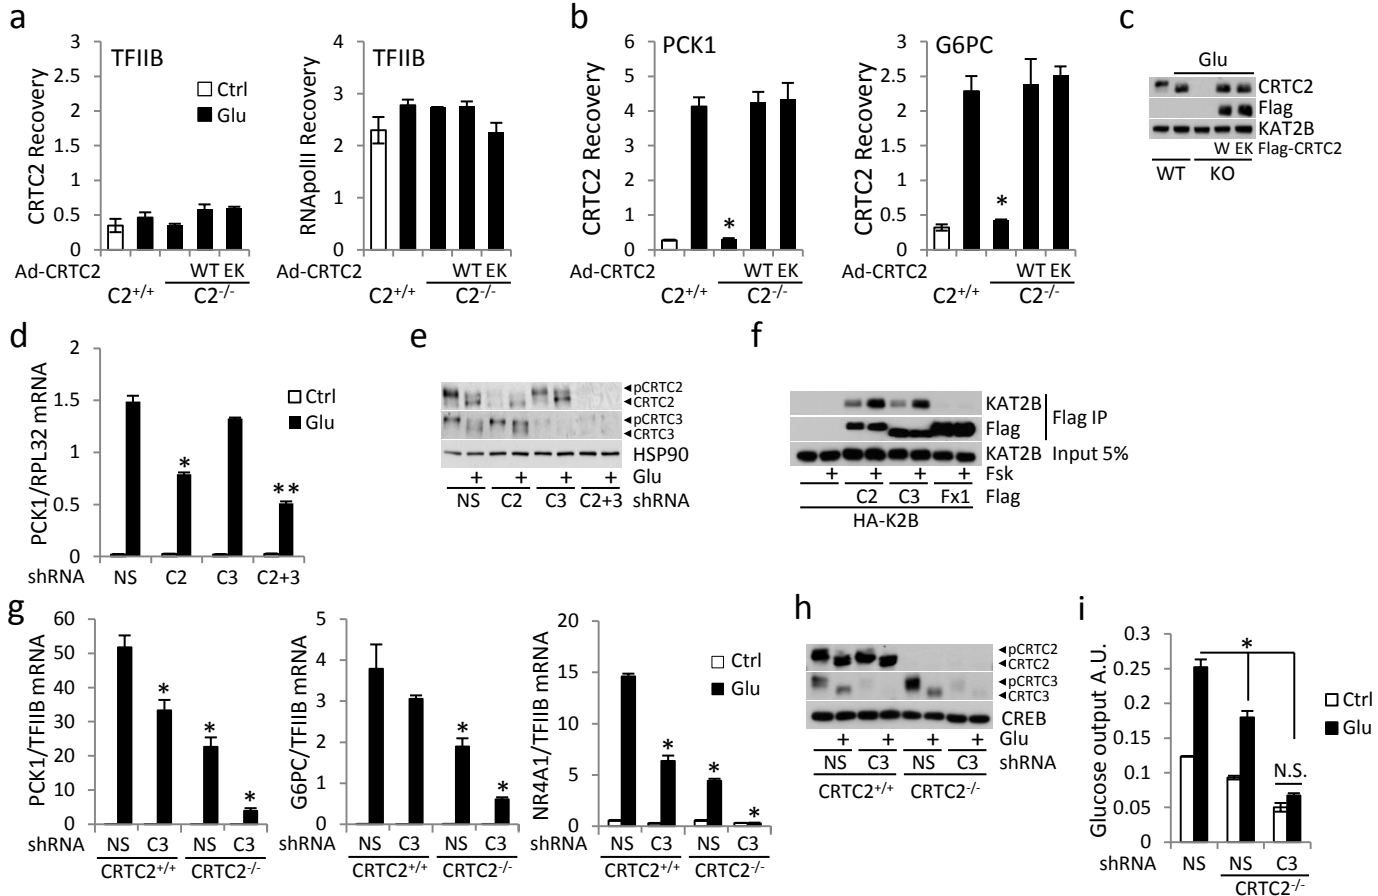

**Supplementary figure 8.** **a, b**, Chromatin Immunoprecipitation assay of CRTC2 and RNA Pol II occupancy over control (*TfiiB*) (**a**) and gluconeogenic (**b**) genes in wild-type or *Crtc2*<sup>-/-</sup> hepatocytes following reconstitution with wild-type or KAT2B-defective (E665K) mutant CRTC2 (\*;  $P < 0.05$ ; n=3). **c**, Immunoblot showing levels of endogenous and ectopically expressed Flag-tagged wild type (W) and E665K (EK) CRTC2 proteins. **d-e**, Pck1 mRNA levels (**d**) and western blots (**e**) from primary hepatocytes depleted for CRTC2 and 3 alone or in combination (\*;  $P < 0.05$ , \*\*;  $P < 0.01$ ). **f**, Co-immunoprecipitation of HA-KAT2B with Flag-CRTC2 (C2) and Flag-CRTC3 (C3) from HEK293T cell lysates. Flag-FoxO1 (Fx1) is used as negative control. Treatment with FSK (1 hour) indicated. **g-i**, Wild type and *Crtc2* deficient hepatocytes depleted for CRTC3 (C3); mRNA levels (**g**), protein levels (**h**) and glucose output (**i**) (\*;  $P < 0.05$ ; n=4).

## Supplementary Figure 9

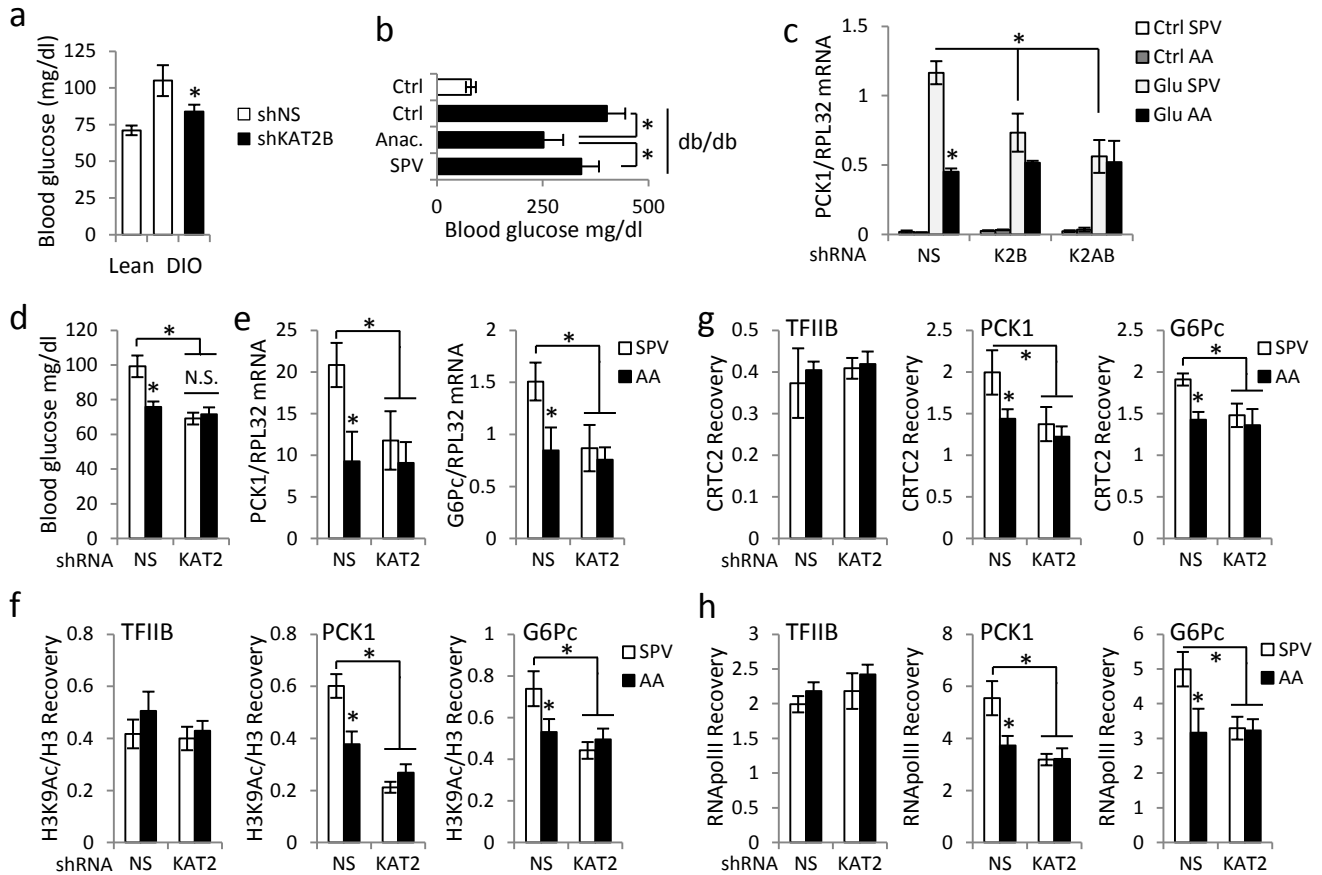

**Supplementary figure 9. a**, Effects of *Kat2b* depletion on fasting blood glucose in DIO mice (\*;  $P < 0.05$ ;  $n = 3$ ). **b**, Fasting blood glucose in lean and obese *db/db* mice injected IP for 5 consecutive days with anacardic acid (15mg/kg), SPV-106, or vehicle (\*;  $P < 0.05$ ;  $n = 4$ ). **c**, Effect of glucagon on *Pck1* mRNA levels in primary hepatocytes depleted for KAT2B alone or KAT2A and B in the presence of SPV-106 or anacardic acid (20uM). **d-h**, fasting blood glucose (d), mRNA levels (e), H3K9Ac levels (f), RNAPolIII (g) and CRTC2 recruitment (h) to *Pck1*, *G6pc* and *Tfiiib* promoters in control or KAT2A/B depleted livers from mice treated with SPV-106 or anacardic acid (15mg/kg). (\*;  $P < 0.05$  relative to SPV-106;  $n = 3$ ).



## Supplementary Figure 10

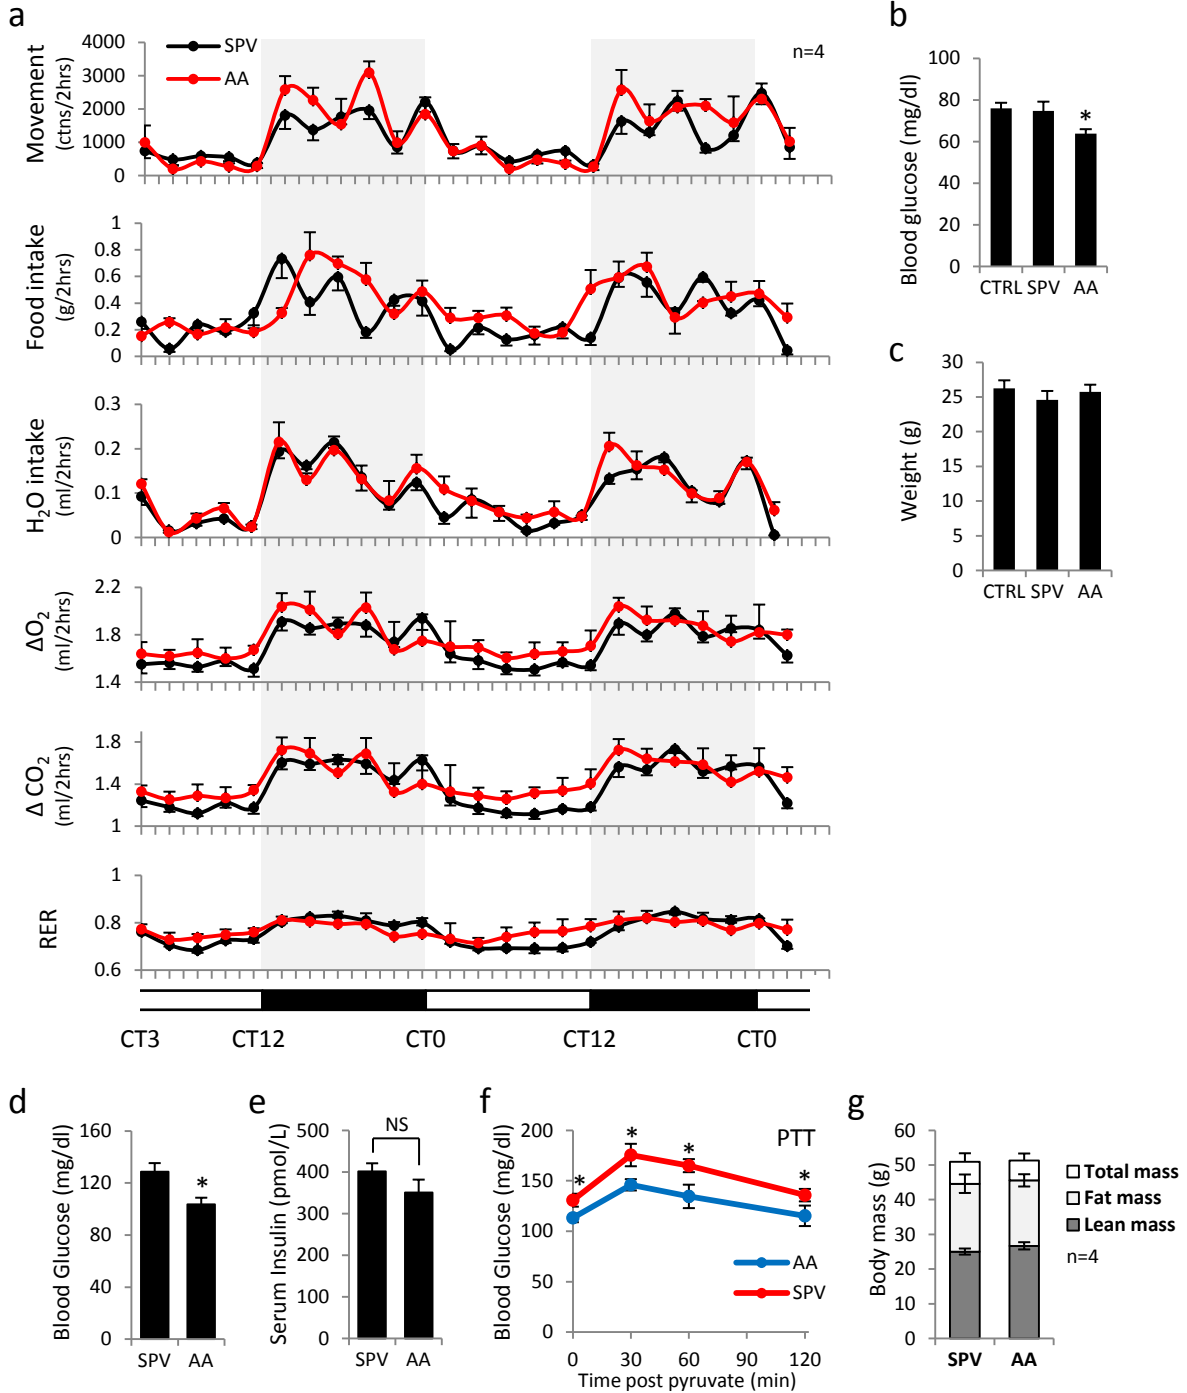

**Supplementary figure 10.** **a**, Metabolic data for ad lib fed, lean mice after a 5-day treatment with SPV-106 or anacardic acid (15mg/kg). **b-c**, Fasting blood glucose (**b**) and body weight (**c**) in lean mice injected IP for 5 consecutive days with anacardic acid (15mg/kg), SPV-106, or vehicle (\*;  $P < 0.05$ ;  $n = 4$ ). **d-g**, Effects of SPV-106 and anacardic acid treatment (15mg/kg) on blood glucose levels (**d**), serum insulin (**e**), pyruvate tolerance (**f**) and body composition (**g**) in DIO mice (\*;  $P < 0.05$ ;  $n = 4$ ).

## Supplementary Table 1

### Primers for gene expression analysis

|         |     |                       |
|---------|-----|-----------------------|
| mG6Pase | Fwd | CTGCTACTAAAAGGGCTAGG  |
|         | Rev | CTTAGCTTTCTCCAAAGTCC  |
| mGcK    | Fwd | CAGAACTGTAAGCCACTCAG  |
|         | Rev | CACAAACATTCCAGAGACAG  |
| mIGFBP1 | Fwd | AGCAAACAGTGTGAGACATC  |
|         | Rev | GTAGACACACCAGCAGAGTC  |
| mKAT2A  | Fwd | GCTCTTGGGAATGGTAGTAG  |
|         | Rev | CCTTGTGAACAGACATGAAC  |
| mKAT2B  | Fwd | ATGTGGAGTACCTCTTCACC  |
|         | Rev | TGTTTGGTATCTGCATCTTC  |
| mNR4A1  | Fwd | TCCTCCACGTCTTCTTCCTC  |
|         | Rev | CCGTACACCTGGAAGTCCTC  |
| mPCK1   | Fwd | TGAGTAGCACAGAGAACAGG  |
|         | Rev | GTGTCAAATGCAAACCTTCAG |
| mPGC1a  | Fwd | GCAGCGGTCTTAGCACTCA   |
|         | Rev | TGATCCTGTGGGTGTGGTTT  |
| mRPL32  | Fwd | GAGATTGCTCACAATGTGTC  |
|         | Rev | GCTGCTCTTTCTACAATGG   |
| mTFIIB  | Fwd | TCAGCTGAGAAGCGAACACA  |
|         | Rev | AGCAACACCAGCAATATCCC  |
| mWDR5   | Fwd | GTCCTTCGTGAAGTTCTCTC  |
|         | Rev | CTTCAGTGTGTTGTCCAAG   |

### Primers for ChIP analysis

|                 |     |                         |
|-----------------|-----|-------------------------|
| mG6Pase (-2854) | Fwd | GTCTACTTTGCCCTCAACTC    |
|                 | Rev | AGCTGTGGTGATTCTAGGAC    |
| mG6Pase CRE     | Fwd | ATCAGGCTGTTTTTGTGTG     |
|                 | Rev | CATCATCAGTAGGTTGATGC    |
| mG6Pase         | Fwd | CTTGAATTGCTCAACTTCTG    |
|                 | Rev | TAAACTACACGTGGGAACAC    |
| mGCGR           | Fwd | CAGCTTCCAGCTTCTCACAC    |
|                 | Rev | GGAAGCGAATCCATCTGAAG    |
| mGcK            | Fwd | TACAGACATCTGGTGACAGC    |
|                 | Rev | CCTCCTAGTGTGTCTCTTCC    |
| mIGFBP1 prom.   | Fwd | GTTTGTGTAGAGCTCACAAGC   |
|                 | Rev | CACAGGTTAATGATTGTCAGG   |
| mIGFBP1         | Fwd | AAGAAAGTTTGCAGGTTAGG    |
|                 | Rev | TCCACTGAAAGACCGAGTA     |
| hNR4A1 Enh. CRE | Fwd | ATTTTTAGCCCCATTGATGAGG  |
|                 | Rev | ATTGACGTCTCCGGAATCC     |
| hNR4A1 prom.    | Fwd | CAGGGTCACGCTCATGCT      |
|                 | Rev | CAAGAGCCCAAATAGTCAGCT   |
| mhNR4A1 CRE     | Fwd | GATCAAACAATCCGCGCTC     |
|                 | Rev | ATGTCTGCGCGCGTGA        |
| mNR4A1          | Fwd | GCTTGTTTAGGAGGTTTCC     |
|                 | Rev | CAGAGTACAGAGTGCCTCAC    |
| mPCK1 (-1862)   | Fwd | TCTCCTAGAGGATCATGGAC    |
|                 | Rev | ATAGTAGCCCAATGATGGTG    |
| mPCK1 CRE       | Fwd | TCTCCCTGGAGTTTATTGTG    |
|                 | Rev | TACTATATAGAAGGGAGGACAGC |
| mPCK1           | Fwd | GTCATTTTCATTCACCTCTCC   |
|                 | Rev | AGGGTAAAGAACATGAGTGG    |
| mPdx1           | Fwd | CACCATGAACAGTGAGGAG     |
|                 | Rev | TCCTTGTAGAGCTGTGTGG     |
| hRab5b prom.    | Fwd | CTCGTACTTGTGGTGACAG     |
|                 | Rev | ACCAATCCTCTGGAGAAAG     |
| hSnx16 prom.    | Fwd | TCAGGTAGCGAAGATAAATG    |
|                 | Rev | AGATAGTGACAGAGAATGTGG   |
| mTFIIB prom.    | Fwd | GAAGATTTTGCCAATCAAC     |
|                 | Rev | CTGTGTACTTCTGGTTGTC     |
| mTFIIB          | Fwd | CTTCAACCGTCTTTGTGTC     |
|                 | Rev | CGTAAGGGAGAAAATACACAG   |

Supplementary Table 2a:

Recorded body weights for selected mice

| Figure      |            | Average BW  | Suppl. Figure |            | Average BW |
|-------------|------------|-------------|---------------|------------|------------|
| <b>1a-e</b> | Lean       | 31.2        | <b>1a-e</b>   | Lean       | 32.2       |
|             | db/db      | 50.8        |               | DIO        | 40.8       |
| <b>2a,b</b> | shNS       | 33.2 (33.4) | <b>2b</b>     | Lean       | 33.3       |
|             | shKAT2B    | 32.8 (32.5) |               | Lean, shNS | 32.9       |
|             | shWDR5     | 33.7 (32.9) |               | DIO, shNS  | 42.8       |
| <b>2c</b>   | shNS       | 31.7        | DIO, shW5     | 43.8       |            |
|             | shKAT2A    | 30.9        | DIO, shK2B    | 43.5       |            |
|             | shKAT2B    | 31.2        | <b>2d-f</b>   | Lean, WT   | 30.4       |
|             | shKAT2AB   | 32.0        |               | Lean, KO   | 28.9       |
| <b>2d</b>   | shNS       | 25.3        | DIO, WT       | 46.1       |            |
|             | shKAT2B    | 24.7        | DIO, KO       | 44.9       |            |
| <b>5a</b>   | Lean       | 34.6        | <b>9b</b>     | Lean       | 34.4       |
|             | db/db      | 49.3        |               | db/db      | 52.6       |
| <b>5b</b>   | Lean       | 30.5        | db, Anac.     | 51.4       |            |
|             | DIO        | 44.7        | db, SPV       | 53.0       |            |
|             | Lean       | 36.1        | <b>9d-h</b>   | shNS, SPV  | 31.0       |
| db/db       | 55.3       | shNS, AA    |               | 31.4       |            |
| Lean        | 32.0       | shK2B, SPV  |               | 30.7       |            |
| <b>5d</b>   | DIO        | 44.6        | shK2B, AA     | 30.5       |            |
|             | DIO, Anac. | 45.4        |               |            |            |
|             | DIO, SPV   | 44.5        |               |            |            |
|             |            |             |               |            |            |

( ) indicates BW before i.v. adenoviral infection.

Supplementary Table 2b:

GO analysis of biological process affected by both shK2B and shW5 in primary hepatocytes

| GO Term    | Description                            | P-value  | Enrichment |
|------------|----------------------------------------|----------|------------|
| GO:0030240 | skeletal muscle thin filament assembly | 1.09E-06 | 96.39      |
| GO:0002526 | acute inflammatory response            | 1.28E-05 | 16.07      |
| GO:0006006 | glucose metabolic process              | 2.17E-05 | 8.23       |
| GO:0050878 | regulation of body fluid levels        | 5.64E-05 | 7.1        |
| GO:0051336 | regulation of hydrolase activity       | 5.68E-05 | 3.08       |
| GO:0015748 | organophosphate ester transport        | 6.92E-05 | 11.48      |
| GO:0070857 | regulation of bile acid biosynthesis   | 3.18E-04 | 64.26      |
| GO:0006082 | organic acid metabolic process         | 3.67E-04 | 2.73       |
| GO:0010035 | response to inorganic substance        | 4.32E-04 | 4.46       |
| GO:0006641 | triglyceride metabolic process         | 6.84E-04 | 9.89       |
| GO:0030162 | regulation of proteolysis              | 9.40E-04 | 4.5        |
